# Supplementary material for: The Unintended Repelling Consequences of Migration Policy Change: Why a Targeted Travel Ban Mostly Reduced Visitors from Non-Targeted Countries
Source: Research Square preprint supplement (doi:10.21203/rs.3.rs-8496996/v1), 2026-02-05
Supplement: Supplementary file 1 [file 5f67f51aa844c728d3e848c6.docx]

**Supplementary Material For Review**

**Table of Contents**

**Tables………………………………………………………………………..……...1-7**

**Figures…………………………………………………………………………...…6-17**

**Table A1: Description of the Data Set**

|  | Obs. | Average | Std. Error | Max | Min |
| --- | --- | --- | --- | --- | --- |
| **Type 1: Target dependent variable** | | | | | |
| Count of citizen who enter the USA and Canada by nationalities | 274678693 | 178362 | 446072.54 | 3585256 | 453 |
| Count of citizen who enter the USA and Canada by continents | 309588100 | 690853 | 774529 | 3627292 | 3863 |

**Table A2: Data Description of Dependent Variable by Nationalities**

| | **Region** | **Country** | **USA Avg (SE)** | **Canada Avg (SE)** | | --- | --- | --- | --- | | **Asia** | India | 92,838 (30,291) | 18,866 (9,515) | |  | Japan | 302,659 (38,962) | 25,378 (10,837) | |  | South Korea | 162,860 (27,732) | 20,374 (10,022) | |  | PRC (excl. HK) | 230,661 (71,267) | 50,255 (26,080) | |  | Taiwan | 37,753 (7,831) | 7,739 (4,072) | | **South America** | Argentina | 66,792 (11,784) | 1,820 (919) | |  | Brazil | 155,986 (38,860) | 10,124 (3,964) | |  | Columbia | 68,545 (18,496) | 2,434 (1,528) | | **North America** | Canada | 1,682,519 (331,085) | - | |  | Mexico | 1,517,435 (186,721) | 22,591 (12,127) | |  | USA | - | 1,940,218 (790,189) | | **Europe** | France | 138,894 (42,917) | 45,154 (24,290) | |  | Germany | 175,117 (44,226) | 31,275 (18,800) | |  | Ireland | 37,133 (8,250) | 5,119 (2,562) | |  | Italy | 83,841 (27,138) | 11,318 (8,395) | |  | Netherlands | 57,454 (19,603) | 11,143 (7,635) | |  | Russia | 19,934 (4,143) | 1,877 (691) | |  | Spain | 64,932 (18,055) | 7,268 (5,629) | |  | Sweden | 46,002 (10,377) | 4,054 (1,304) | |  | Switzerland | 40,038 (14,003) | 10,457 (6,883) | |  | United Kingdom | 381,909 (91,229) | 67,215 (35,305) | | **Oceania** | Australia | 114,421 (23,607) | 28,741 (14,183) | |
| --- | --- | --- | --- | --- | --- | --- | --- | --- | --- | --- | --- | --- | --- | --- | --- | --- | --- | --- | --- | --- | --- | --- | --- | --- | --- | --- | --- | --- | --- | --- | --- | --- | --- | --- | --- | --- | --- | --- | --- | --- | --- | --- | --- | --- | --- | --- | --- | --- | --- | --- | --- | --- | --- | --- | --- | --- | --- | --- | --- | --- | --- | --- | --- | --- | --- | --- | --- | --- | --- | --- | --- | --- | --- | --- | --- | --- | --- | --- | --- | --- | --- | --- | --- | --- | --- | --- | --- | --- | --- | --- | --- | --- |

**Table A3: Data Description of Dependent Variable by Continents**

| Continents | Average (Standard error) count of foreigners who enters USA | Average count (Standard error) of foreigners who enters Canada |
| --- | --- | --- |
| Africa | 50,257 (31,720) | 10,123 (5,084) |
| Asia | 91,9671 (145,805) | 165,771 (75,966) |
| Middle East | 1,117,056(79,135) | 9,432 (5,400) |
| Latin America (Excluding Mexico) | 648,794 (104,836) | 37,110 (16,347) |
| Europe | 1,238,342 (266,315) | 237,560 (128,899) |
| Total Foreign | 7,177,746 (3,502,454) | 2,448,893 (1,047,850) |

**Table A4: Arithmetic Calculations of Raw Differences Between the United States and Canada in the Change in Foreigners Entering the United States Before and After the Election, Travel Ban, and Court Upholding Travel Ban (N=7,177,746)**

| Change in Entries After Event Minus Entries Before Event, Into Country | Total | Africa | Asia | Europe | Latin America (Excluding Mexico) | Middle East |
| --- | --- | --- | --- | --- | --- | --- |
| Election, US | -1559338 | -32661 | -6093 | -61452 | -95627 | 1622 |
| Election, Canada | 110467 | 767 | 15628 | 12602 | 6077 | 207 |
| difference in difference (US minus Canada) | -1669806 | -33428 | -21721 | -74053 | -101704 | 1416 |
| Obstructed Ban, US | -1070567 | -28642 | 19719 | 72437 | -123040 | -37322 |
| Obstructed Ban, Canada | 595363 | 2656 | 52559 | 76500 | 12153 | 2034 |
| Difference-in-difference (US minus Canada) | -1665930 | -31298 | -32840 | -4063 | -135193 | -39356 |
| Court Uphold Ban, US | -204701 | -14193 | 151052 | 222666 | -55989 | -7125 |
| Court Uphold Ban, Canada | 1659633 | 7971 | 126936 | 207834 | 27660 | 7260 |
| Difference-in-difference (US minus Canada) | -1864334 | -22164 | 24116 | 14832 | -83649 | -14385 |

| **Table A5: Changes in Entries by Continent and Country, 12 Months Before and After the Event For US and Canada (N=7,177,746)** | | | | | | | | | |
| --- | --- | --- | --- | --- | --- | --- | --- | --- | --- |
| Change in Entries After Event Minus Entries Before Event, Into Country | Election US | Election Canada | DID | Ban, US | Ban, Canada | DID | Court Uphold Ban, US | Court Uphold Ban, Canada | DID |
| Argentina | -15130 | 265 | -15394 | -15085 | 762 | -15847 | -15570 | 1714 | -17284 |
| Australia | -3967 | 3885 | -7852 | 402 | 7156 | -6754 | 21073 | 21518 | -446 |
| Brazil | -19624 | 2250 | -21874 | -31917 | 3500 | -35417 | -16618 | 7540 | -24158 |
| Canada | 63692 | NA | NA | 217601 | NA | NA | 339727 | NA | NA |
| Colombia | -7746 | 533 | -8279 | -12233 | 1081 | -13314 | -3380 | 2622 | -6002 |
| France | -1363 | 2873 | -4236 | 21734 | 14275 | 7459 | 36765 | 39250 | -2485 |
| Germany | -8879 | 2512 | -11391 | 16975 | 13292 | 3683 | 37299 | 32612 | 4687 |
| India | -9128 | 3734 | -12863 | -346 | 8273 | -8619 | 7677 | 12875 | -5198 |
| Ireland | 1472 | 647 | 826 | 3854 | 1893 | 1961 | 9084 | 4588 | 4496 |
| Italy | 2541 | 91 | 2450 | 6065 | 3695 | 2370 | 27541 | 12874 | 14667 |
| Japan | -2467 | -1280 | -1188 | 8672 | 3834 | 4838 | 30287 | 11566 | 18721 |
| Mexico | -145385 | 12334 | -157720 | -211946 | 16633 | -228579 | -95153 | 24061 | -119214 |
| Netherlands | -460 | 788 | -1248 | 8372 | 4834 | 3538 | 14777 | 11298 | 3479 |
| PRC (Excluding HK) | -8610 | 6319 | -14929 | -4190 | 18012 | -22202 | 58538 | 46955 | 11582 |
| Russia | -5618 | 122 | -5740 | -6887 | 285 | -7172 | -4219 | 988 | -5208 |
| South Korea | 26735 | 2593 | 24142 | 24689 | 7702 | 16988 | 42449 | 17401 | 25048 |
| Spain | 3080 | 748 | 2331 | 5458 | 3235 | 2223 | 21193 | 9091 | 12102 |
| Sweden | -4825 | 200 | -5025 | -5880 | 561 | -6442 | -7121 | 1763 | -8883 |
| Switzerland | -6244 | -205 | -6039 | 922 | 2867 | -1945 | 6644 | 9242 | -2598 |
| Taiwan | 332 | 555 | -222 | 2389 | 2255 | 134 | 9247 | 6122 | 3125 |
| USA | NA | 58876 | NA | NA | 426052 | NA | NA | 1238801 | NA |
| United Kingdom | -32647 | 1843 | -34490 | 15608 | 19115 | -3507 | 57348 | 53477 | 3871 |

Table A6: Results from Difference-in-Difference OLS Models For All Foreign Entries to the US, November 2014 to September 2017

| Term | Coefficient | P-value | Lower CI | Upper CI |
| --- | --- | --- | --- | --- |
| Model 1: Difference-in-Difference Two-Way Fixed Effects OLS Model of Trump’s 2016 Election on Logged Counts of Foreign Entries | | | | |
| Trump’s 2016 Election | -0.325 | 0.026 | -0.510 | -0.141 |
| Model 2: Difference-in-Difference Two-Way Fixed Effects OLS Model of Blocked Travel Ban Executive Order on Logged Counts of Foreign Entries | | | | |
| Blocked Travel Ban EO | -0.472 | 0.005 | -0.640 | -0.305 |
| Model 3: Difference-in-Difference Two-Way Fixed Effects OLS Model of Court Upholding Travel Ban on Logged Counts of Foreign Entries | | | | |
| Court Upholding Travel Ban | -0.687 | 0.000 | -0.757 | -0.617 |

|  |  |  |  |  |  |  |  |
| --- | --- | --- | --- | --- | --- | --- | --- |

| |  |  |  |  |  |  |  |  | | --- | --- | --- | --- | --- | --- | --- | --- |   Table A7: Results from Difference-in-Difference OLS Models For All Nationals From 21 Largest Sources of Tourist Revenue   | **Term** | **Coefficient** | **P-value** | **Lower CI** | **Upper CI** | | --- | --- | --- | --- | --- | | Model 1: Difference-in-Difference Two-Way Fixed Effects OLS Model of Trump’s 2016 Election on Logged Counts of Foreign Entries | | | | | | Trump’s 2016 Election | -0.172 | 0.000 | -0.229 | -0.116 |  | Model 2: Difference-in-Difference Two-Way Fixed Effects OLS Model of Blocked Travel Ban Executive Order on Logged Counts of Foreign Entries | | | | | | | --- | --- | --- | --- | --- | --- | | Blocked Travel Ban EO | -0.347 | 0.001 | -0.506 | -0.187 |   Model 3: Difference-in-Difference Two-Way Fixed Effects OLS Model of Court Upholding Travel Ban on Logged Counts of Foreign Entrie   | Court Upholding Travel Ban | -0.687 | 0.000 | -0.757 | -0.617 | | --- | --- | --- | --- | --- |   Model 4: Difference-in-Difference Two-Way Fixed Effects OLS Model of Trump’s 2016 Election on Logged Counts of Foreign Entries and Interaction With Needing a Visa | | | | | | |
| --- | --- | --- | --- | --- | --- | --- | --- | --- | --- | --- | --- | --- | --- | --- | --- | --- | --- | --- | --- | --- | --- | --- | --- | --- | --- | --- | --- | --- | --- | --- | --- | --- | --- | --- | --- | --- | --- | --- | --- | --- | --- | --- | --- | --- | --- |
| Trump’s 2016 Election | -0.346 | 0.019 | -0.593 | -0.098 |
| Traveler Need A Visa Interacted With Trump’s 2016 Election | 0.495 | 0.066 | 0.019 | 0.970 |
| Model 5: Difference-in-Difference Two-Way Fixed Effects OLS Model of Blocked Travel Ban Executive Order on Logged Counts of Foreign Entries and Interaction With Needing a Visa | | | | | |
| Trump’s 2016 Election | | -0.469 | 0.005 | -0.728 | -0.210 |
| Traveler Need A Visa Interacted With Trump’s 2016 Election | | 0.495 | 0.066 | 0.019 | 0.970 |
| *Model 6: Difference-in-Difference Two-Way Fixed Effects OLS Model of Court Upholding Travel Ban on Logged Counts of Foreign Entries and Interaction With Needing a Visa* | | | | | | |
| Trump’s 2016 Election | | | -0.469 | 0.005 | -0.728 | -0.210 |
| Traveler Need A Visa Interacted With Trump’s 2016 Election | | | 0.351 | 0.127 | -0.065 | 0.767 |

| **Table A8: Odds ratios for whether a text of potential traveler has** | | | | |  |  |
| --- | --- | --- | --- | --- | --- | --- |
| **positive or negative attitude about traveling toward the US** | | | | |  |  |
| **term** | **coefficient** | **std.error** | **p.value** | **odds ratios** | **lci** | **uci** |
| elected | -1.47 | 0.22 | 0.00 | 0.23 | 0.15 | 0.35 |
| ban | -1.83 | 0.38 | 0.00 | 0.16 | 0.08 | 0.34 |
| court_approve | -0.81 | 1.19 | 0.50 | 0.44 | 0.04 | 0.38 |

**Figures**

**
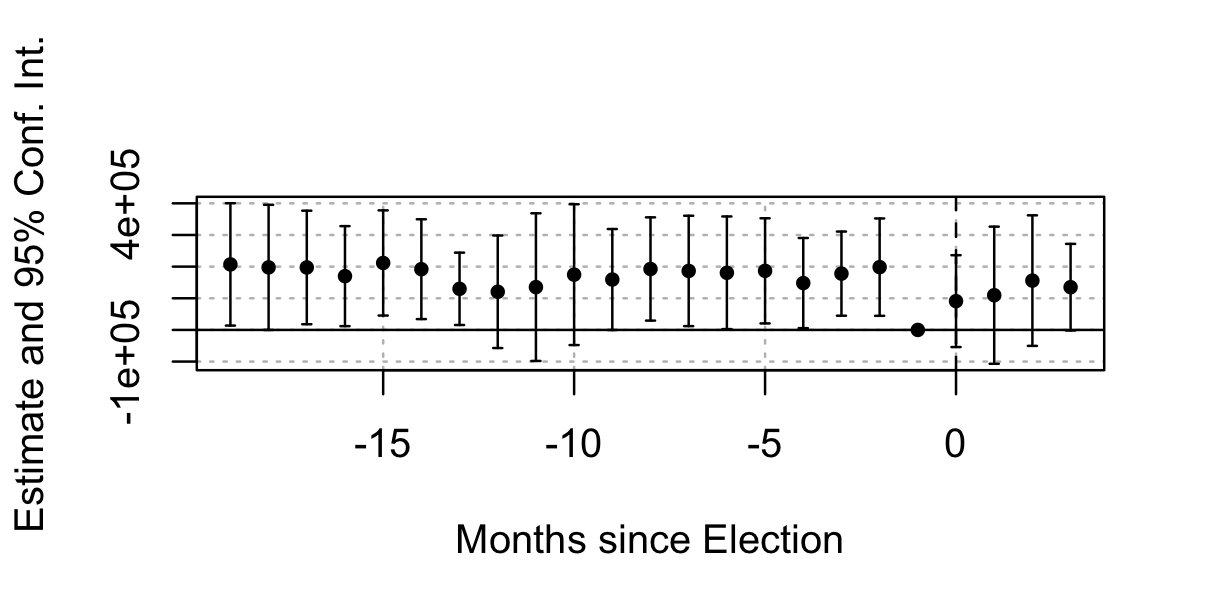
**

**Figure A1: Event Study Testing Parallel Trends Before 2016 Election of Trump for US and Canada**

**
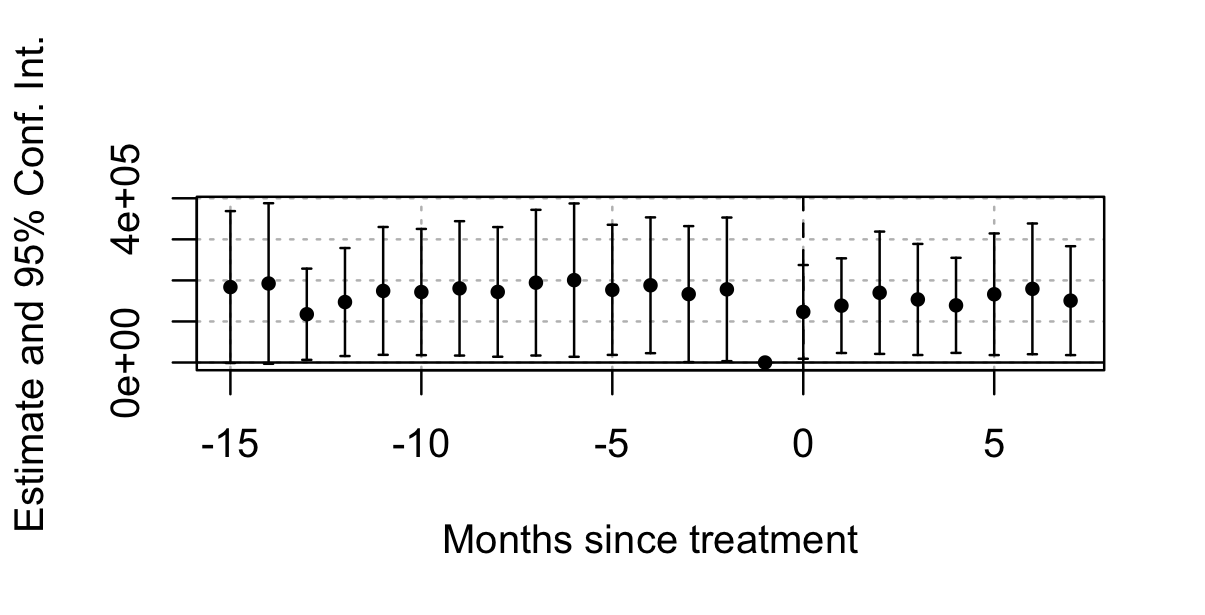
**

**Figure A2: Event Study Testing Parallel Trends Before 2017 Travel Ban Proposal for US and Canada**

**
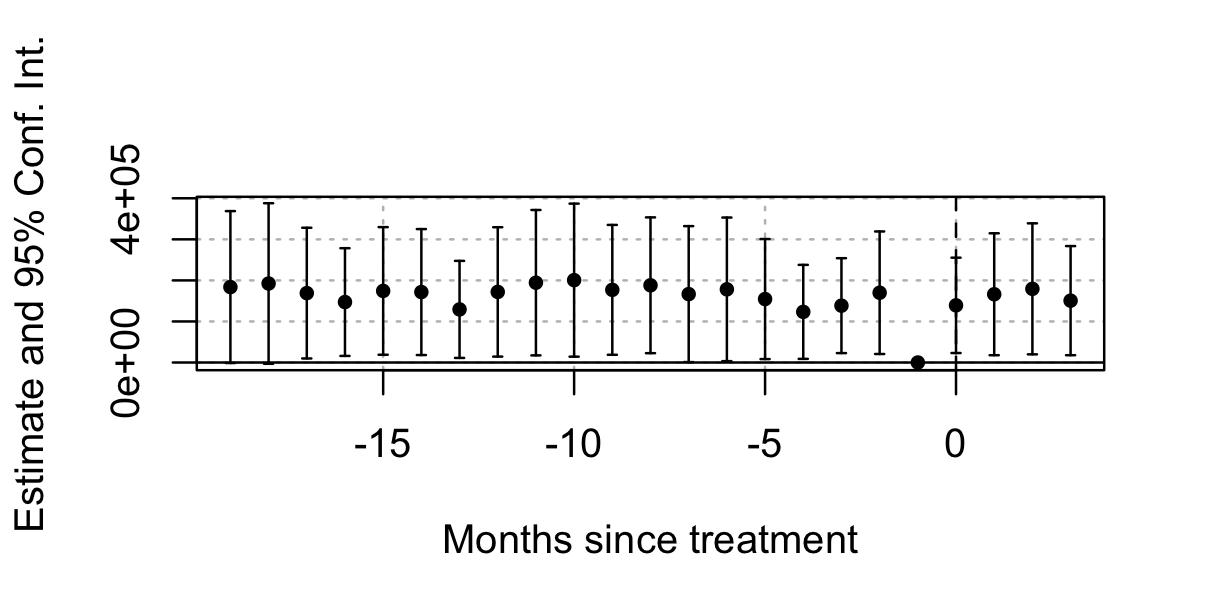
**

**Figure A3: Event Study Testing Parallel Trends Before Court Uphold Ban for US and Canada**
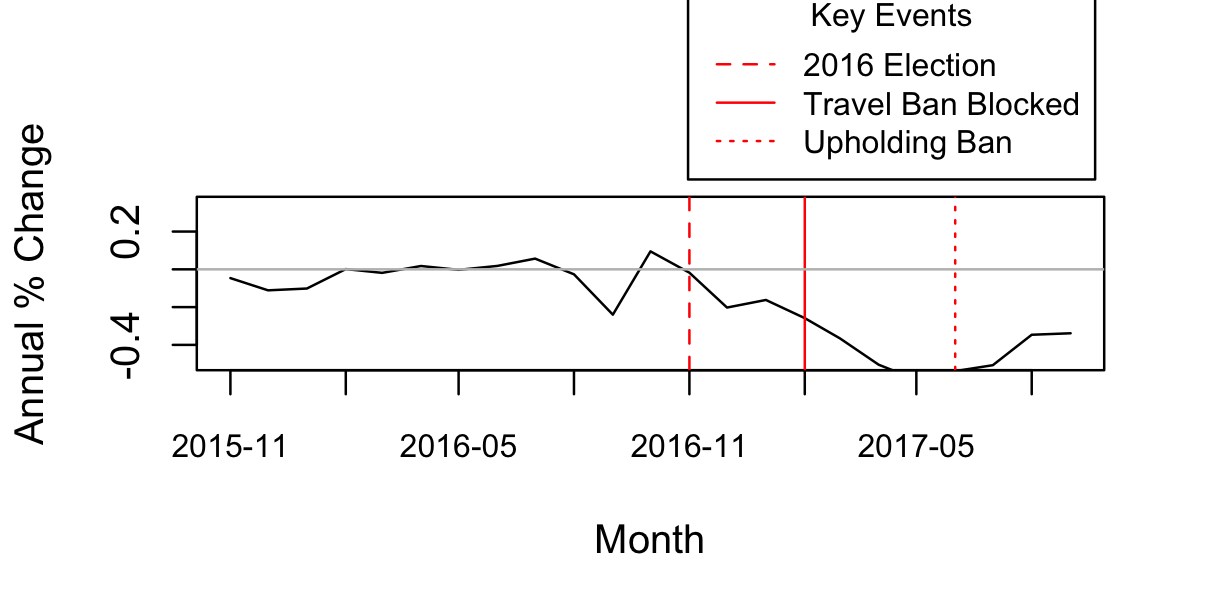


**Figure A4**: Annual % Change in Entries of Foreigners From Russia


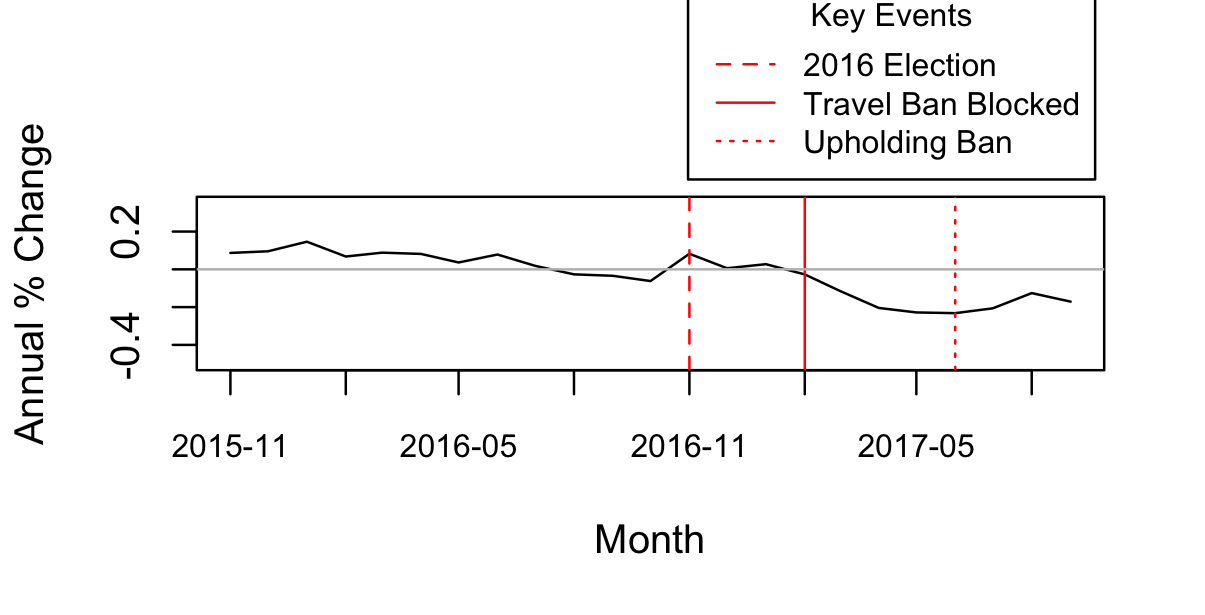


**Figure A5: Annual % Change in Entries of Foreigners From India**


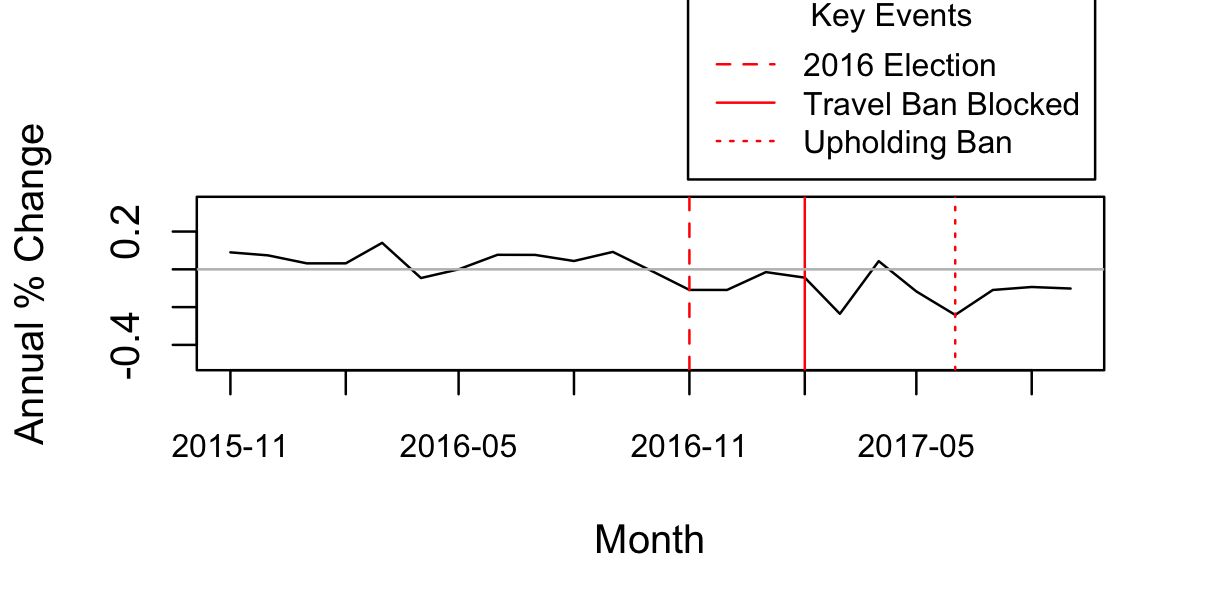


**Figure A6**: Annual % Change in Entries of Foreigners From Mexico


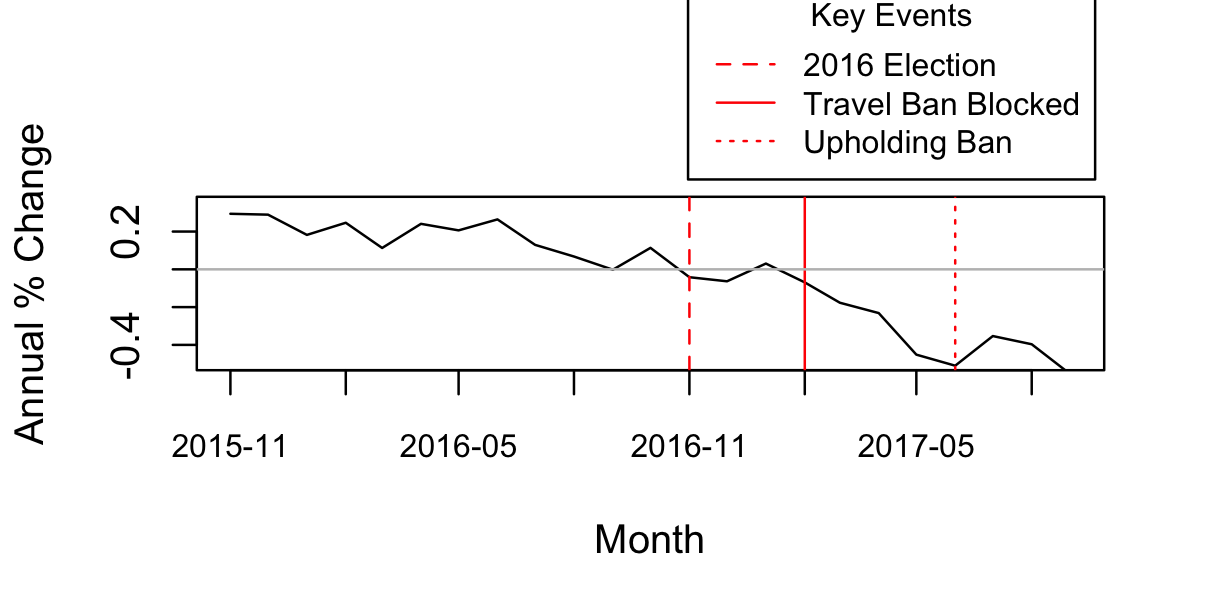


**Figure A7**: Annual % Change in Entries of Foreigners From Argentina


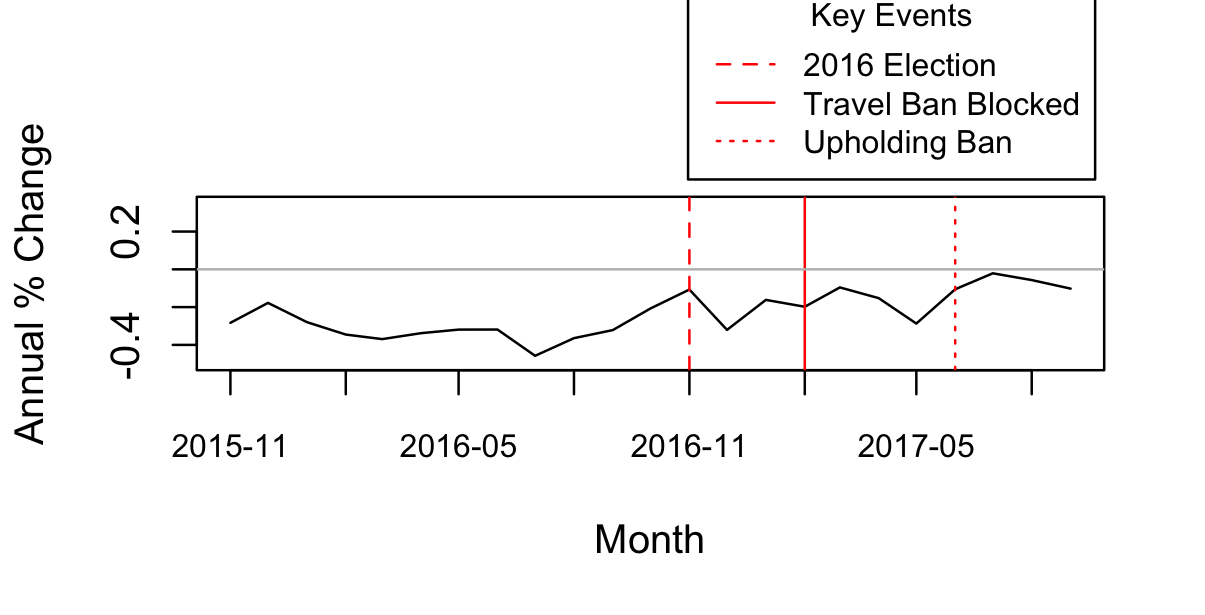


***Figure A8:*** *Annual % Change in Entries of Foreigners From Brazil*


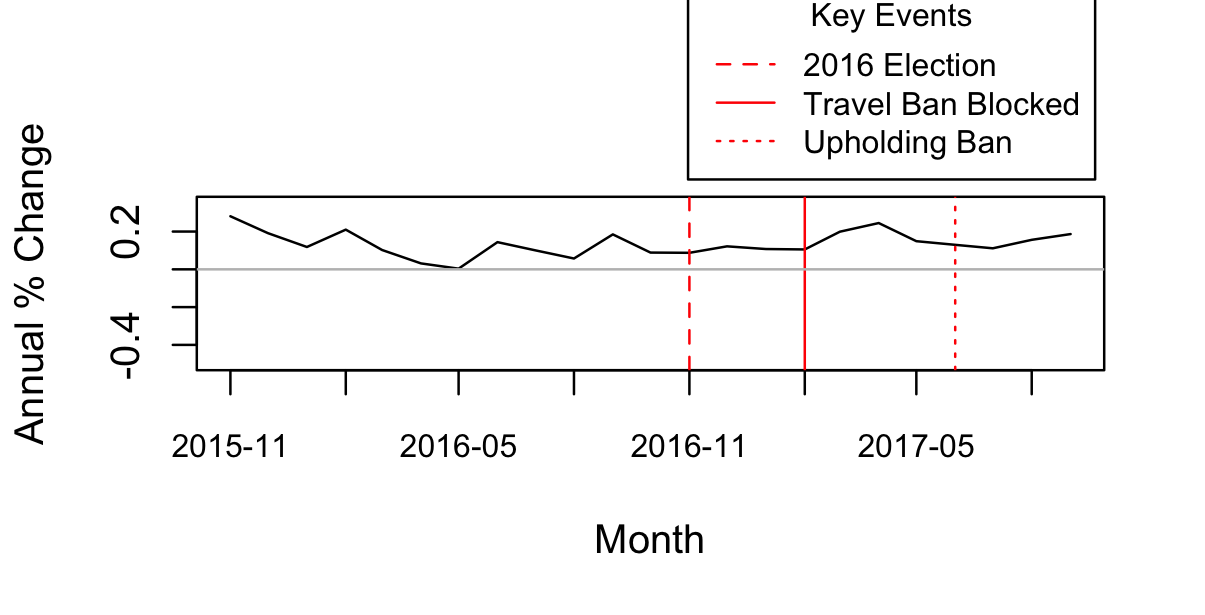


**Figure A9**: Annual % Change in Entries of Foreigners From South Korea


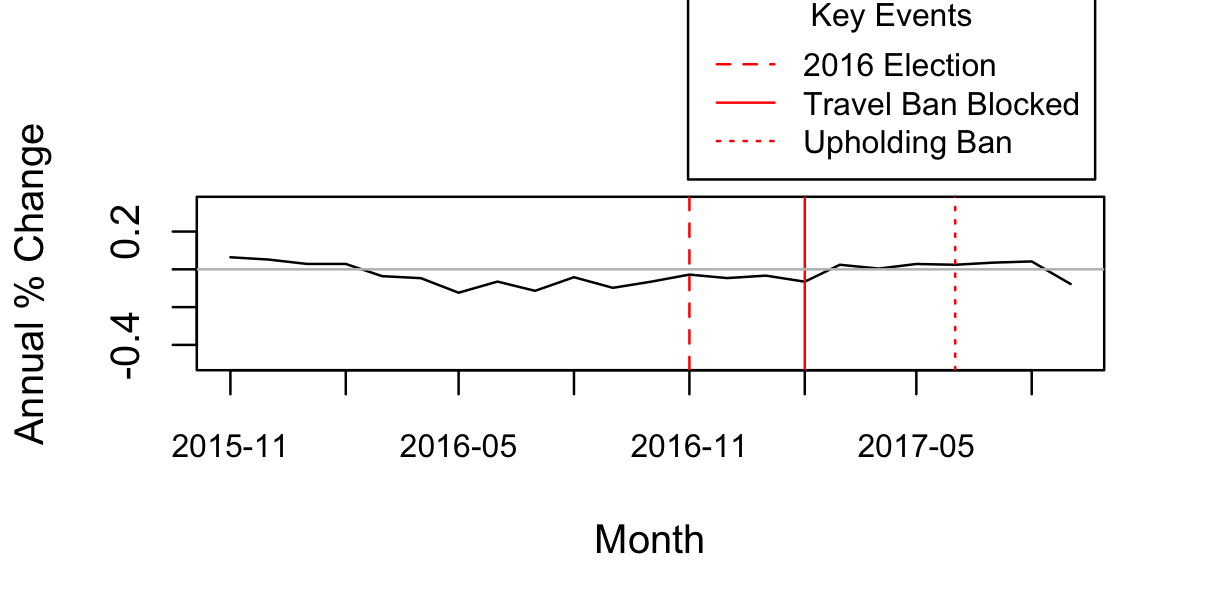


***Figure A10:*** *Annual % Change in Entries of Foreigners From Japan*


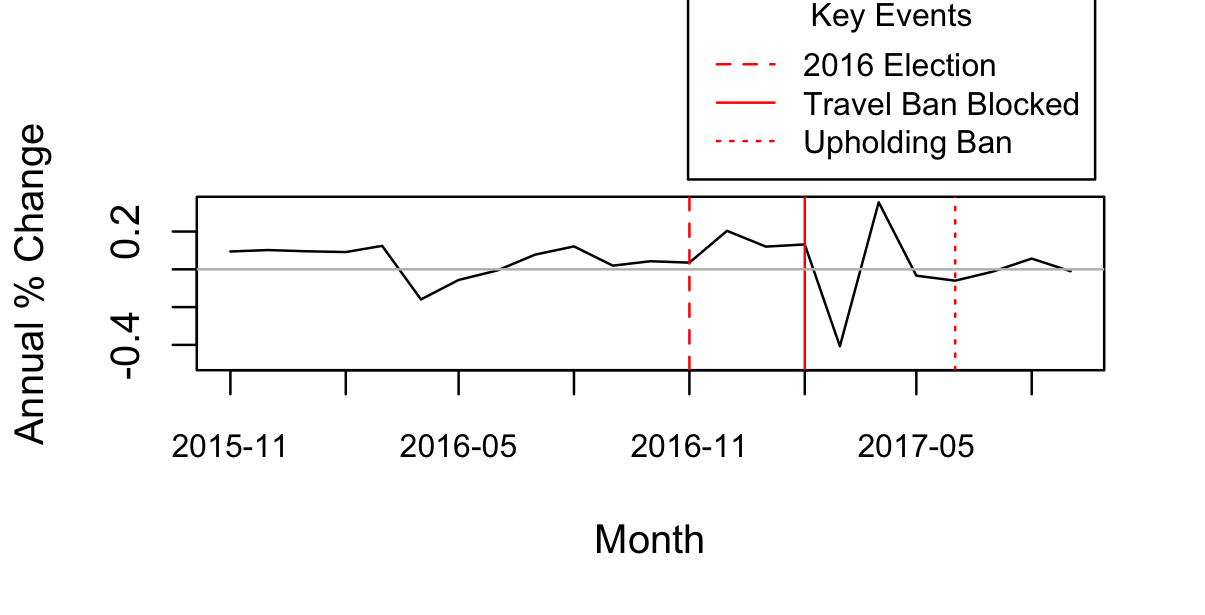


**Figure A11**: Annual % Change in Entries of Foreigners From Spain


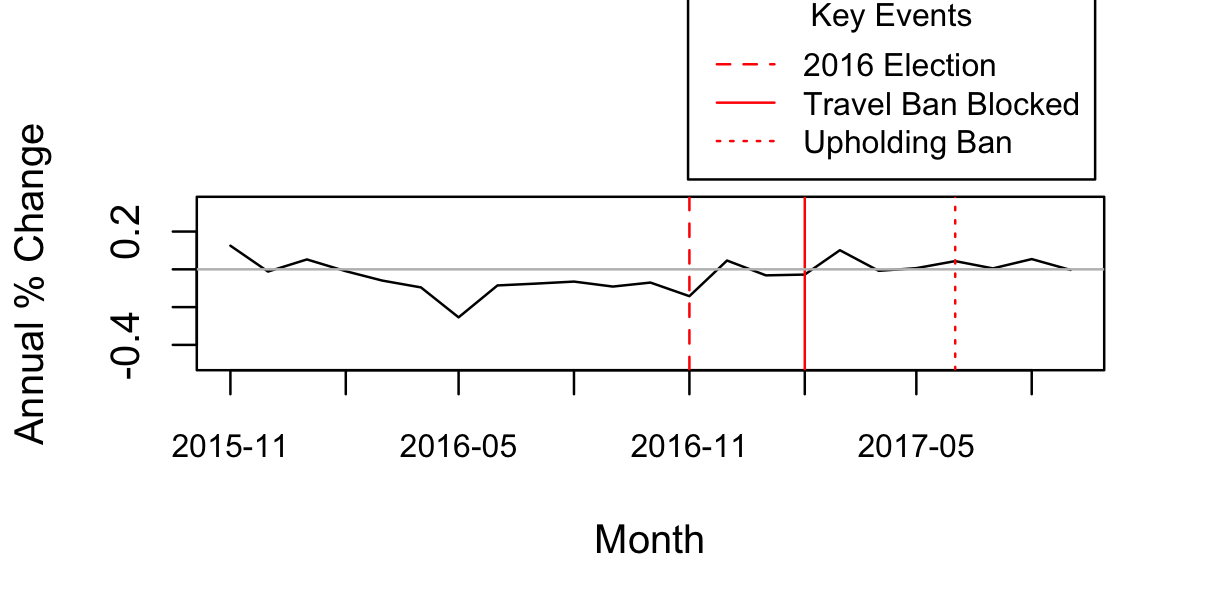


***Figure A12:*** *Annual % Change in Entries of Foreigners From France*


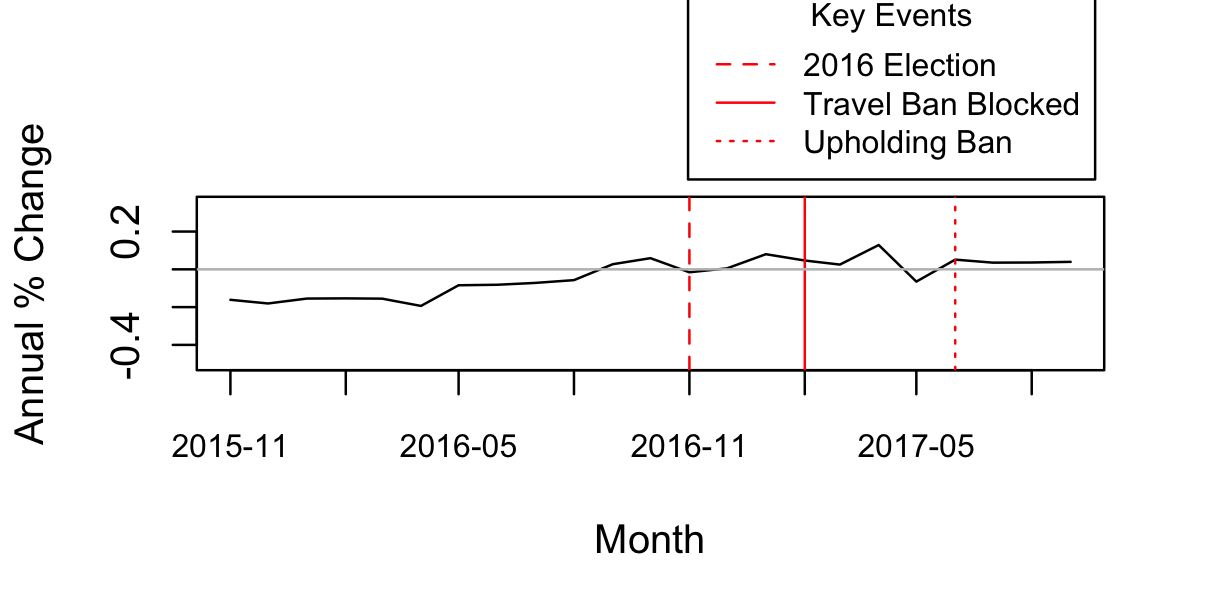


**Figure A13**: Annual % Change in Entries of Foreigners From Canada


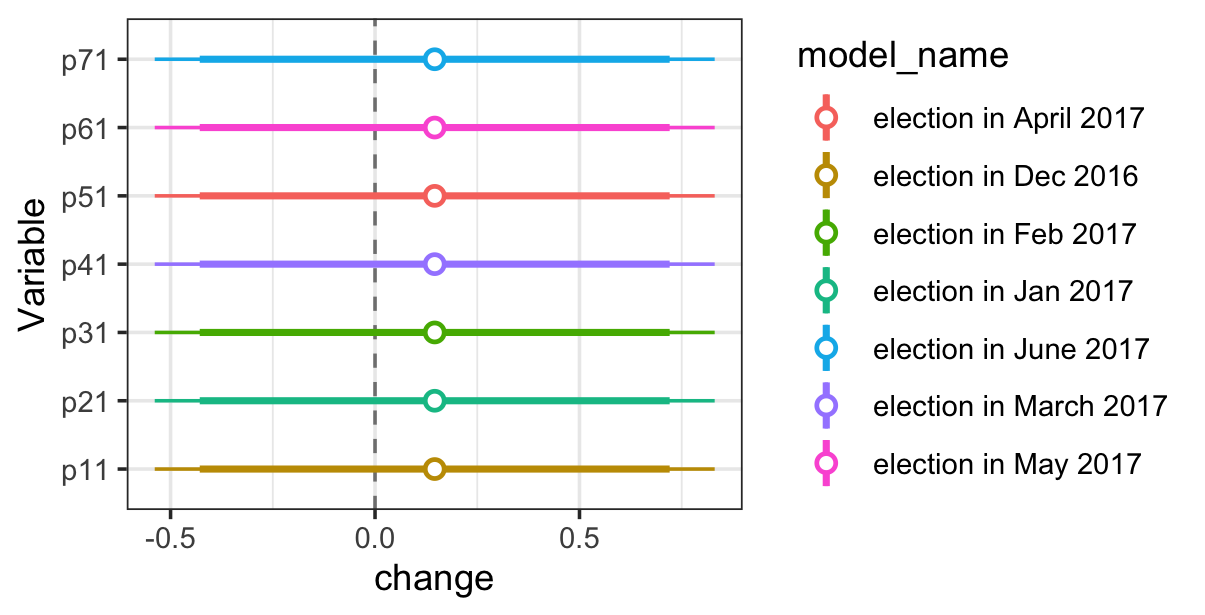


**A14: Placebo OLS Regression Test of Estimated Impact of 2016 Election of Trump on Logged Counts of Foreign Entries If Implemented Another Month**

**
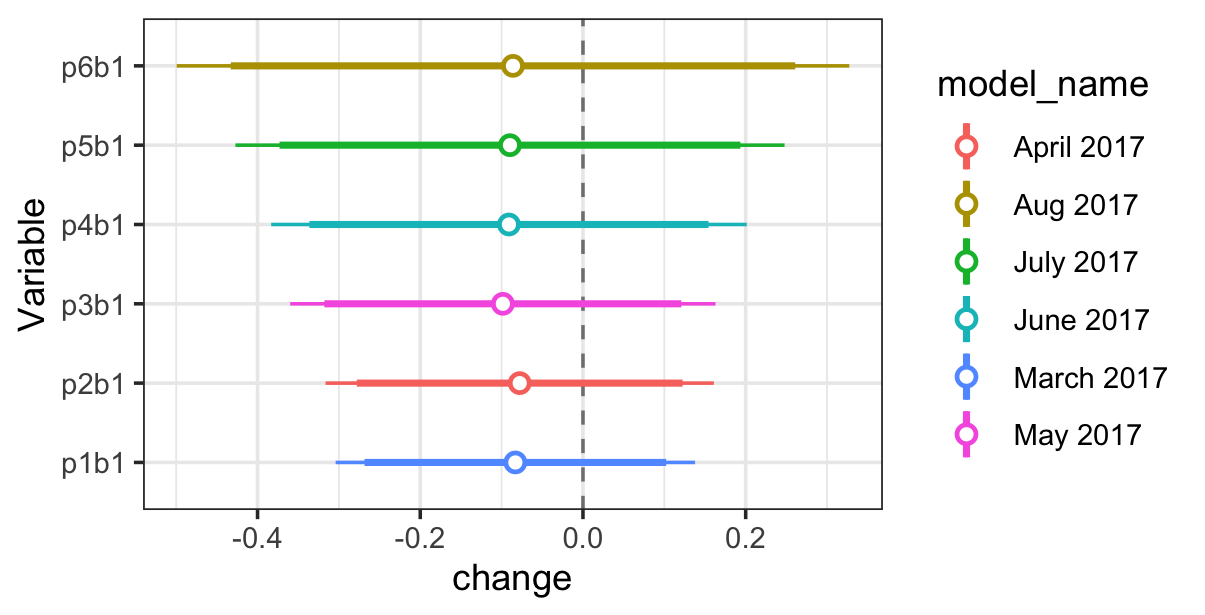
**

**A15: Placebo OLS Regression Test of Estimated Impact of Blocked Travel Ban on Logged Counts of Foreign Entries If Implemented Another Month**

**Figure A16: reasons for not traveling after election, N=451**

**Figure A17: reasons for not traveling after travel ban, N=347**

**Figure A18: Relation of events to attitudes toward travel**

**
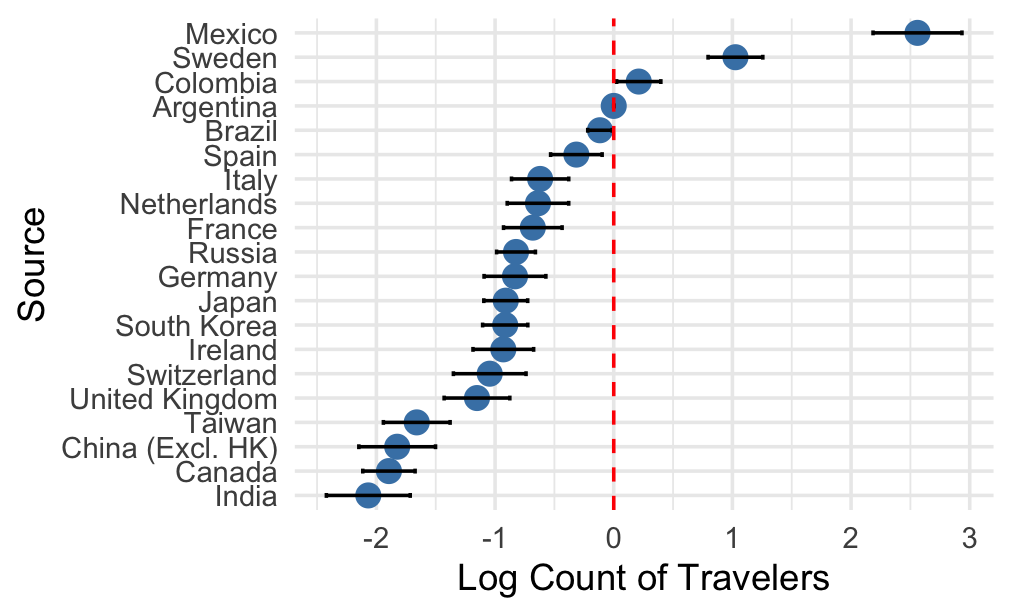
**

**A19: Heterogeneous Impacts of the Election on Logged Counts of Foreigners Entering the US Rather Than Australia (by Country)**


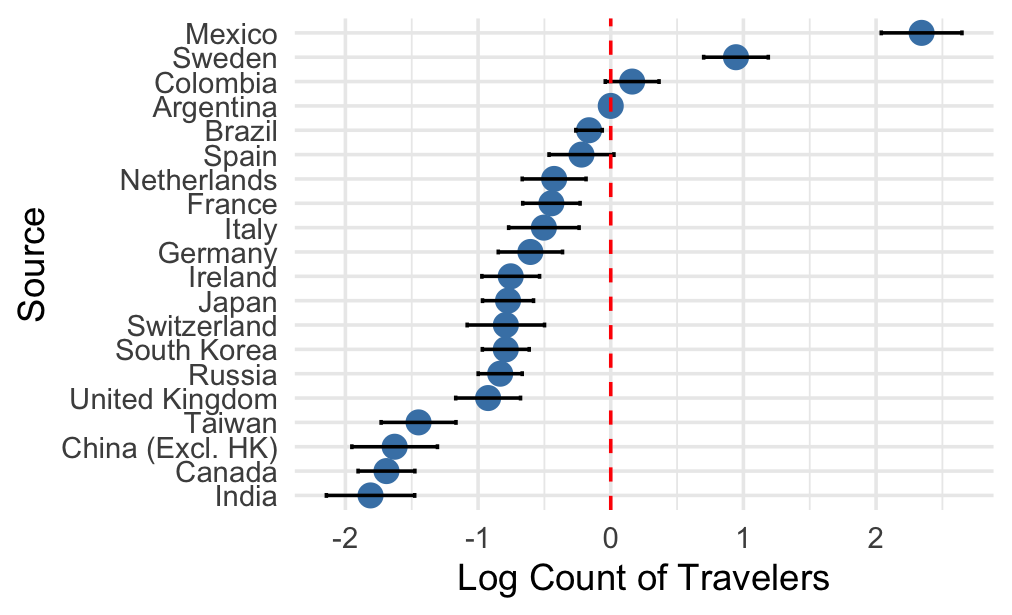


**A20: Heterogeneous Impacts of the Travel Ban Proposal on Logged Counts of Foreigners Entering the US Rather Than Australia (by Country)**

**
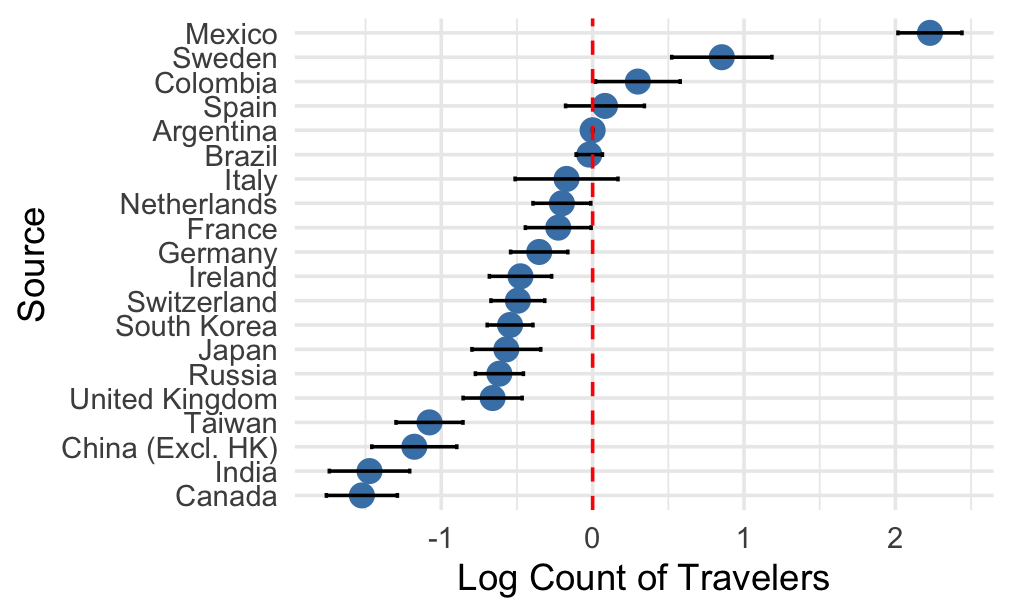
**

**A21: Heterogeneous Impacts of the Court Upholding the Travel Ban on Logged Counts of Foreigners Entering the US Rather Than Australia (by Country)**
